# Supplementary material for: Benzoylaconitine Alleviates Progression of Psoriasis via Suppressing STAT3 Phosphorylation in Keratinocytes
Source: MDPI journal article supplement (doi:10.3390/molecules28114473), 2023-05-31
Supplement: s1 [file s1]

**Table S1.** Primer sequence.

| Primer             | Sequence (5'-3')        |
|--------------------|-------------------------|
| hIL-6- F           | TTCGGTCCAGTTGCCTTCTC    |
| hIL-6- R           | TCTTCTCCTGGGGTACTGG     |
| hIL-8-F            | TCTGTCTGGACCCCAAGGAA    |
| hIL-8- R           | ATGAATTCTCAGCCCTCTCAA   |
| hIL-1 $\beta$ -F   | AGCTACGAATCTCCGACCAC    |
| hIL-1 $\beta$ - R  | CGTTATCCCATGTGTGCAAGAA  |
| hActin-F           | GTACGCCAACACAGTGCTG     |
| hActin-R           | CGTCATACTCCTGCTTGCTG    |
| mIL-6- F           | CTGCAAGAGACTTCCATCCAG   |
| mIL-6- R           | AGTGGTATAGACAGGTCTGTTGG |
| mTNF- $\alpha$ -F  | CCTGTAGCCCACGTCGTAG     |
| mTNF- $\alpha$ - R | GGGAGTAGACAAGGTACAACCC  |
| mIL-23-F           | AATAATGTGCCCCGTATCCAGT  |
| mIL-23- R          | GCTCCCCTTTGAAGATGTCAG   |
| mIL-17A-F          | TTTAACTCCCTTGCGCAAAA    |
| mIL-17A- R         | CTTCCCTCCGCATTGACAC     |
| mActin-F           | GGCACCCTGAACCCTAAGG     |
| mActin-R           | ACAATACCAGTTGTACGTCCAGA |
